# Supplementary material for: The Effect of Implementing Mechanical Cardiopulmonary Resuscitation Devices on Out-of-Hospital Cardiac Arrest Patients in an Urban City of Taiwan
Source: MDPI journal article supplement (doi:10.3390/ijerph18073636), 2021-03-31
Supplement: s1 [file s1]

**Supplementary Table 1.** Summary of the previous studies investigating prehospital use of mechanical CPR devices on the outcome of patients with OHCA

| Study             | Study setting | Results                                                                         | EMS response time (or Call to CPR) (min) | Percentage of witnessed cardiac arrest |
|-------------------|---------------|---------------------------------------------------------------------------------|------------------------------------------|----------------------------------------|
| Anantharaman 2017 | RCTs          | Early applied mCPR device improved ROSC and survival to hospital discharge      | N/A                                      | N/A                                    |
| Axelsson 2006     | Cohort study  | No significant difference in ROSC and Survival to hospital discharge            | 10                                       | 100%                                   |
| Axelsson 2013     | Cohort study  | No survival benefit in use of mCPR devices                                      | 9                                        | 56%                                    |
| Buckler 2016      | Cohort study  | mCPR was associated with lower rate of ROSC and neurological favorable survival | N/A                                      | N/A                                    |
| Newberry 2018     | Cohort study  | No significant difference in ROSC and Survival to hospital discharge            | N/A                                      | 41%                                    |
| Perkins 2015      | RCTs          | No significant difference in ROSC and Survival to hospital discharge            | 6.5 (4.8-9.1)                            | 61%                                    |
| Rubertsson 2014   | RCTs          | No significant difference in ROSC and Survival to hospital discharge            | 10 (7-14)                                | 66%                                    |
| Seewald 2019      | Cohort study  | mCPR was associated with higher rate of ROSC                                    | 9.0 ± 6.3                                | 56.70%                                 |
| Smekal 2011       | RCTs          | No significant difference in ROSC and Survival to hospital discharge            | 7.9                                      | 69.60%                                 |
| Wik 2014          | RCTs          | No significant difference in ROSC and Survival to hospital discharge            | 60% > 5 mins                             | 47.70%                                 |
| Zeiner 2015       | Cohort study  | No significant difference in ROSC and Survival to hospital discharge            | 7 (5-9)                                  | 54.50%                                 |

RCTs=randomized controlled trials; mCPR=mechanical CPR; N/A=not available
